# Supplementary material for: The Effects of Algal Turf Sediments and Organic Loads on Feeding by Coral Reef Surgeonfishes
Source: PubMed Central journal article supplement (PMC5207718; doi:10.1371/journal.pone.0169479), 2017-01-03
Supplement: pone.0169479.s002.pdf [file pone.0169479.s002.pdf]

**S2 Table. Summary of GLMM results used to examine the effects of sediment and organic loads on *Ctenochaetus striatus*.** SE = standard error. Negative binomial models used a *t* statistic while binomial models used a *z* statistic.

| <b>Response variable</b>                        | <b>Model used</b>        | <b>Predictor variable</b> | <b>Estimate</b> | <b>SE</b> | <b><i>t/z</i> value</b> | <b><i>p</i> value</b> |
|-------------------------------------------------|--------------------------|---------------------------|-----------------|-----------|-------------------------|-----------------------|
| <b>Sediment Load Experiment</b>                 |                          |                           |                 |           |                         |                       |
| Number of Bites                                 | Negative-binomial (GLMM) | Intercept                 | 5.0339          | 0.1334    | 37.72                   | <0.0001               |
|                                                 |                          | Sediment Load             | -0.0027         | 0.0004    | -6.35                   | <0.0001               |
| Proportion of bites rejected                    | Binomial (GLMM)          | Intercept                 | -5.7662         | 0.3472    | -16.61                  | <0.0001               |
|                                                 |                          | Sediment Load             | 0.0070          | 0.0010    | 7.27                    | <0.0001               |
| Proportion of feeding bouts with multiple bites | Binomial (GLMM)          | Intercept                 | 1.4865          | 0.1540    | 9.654                   | <0.0001               |
|                                                 |                          | Sediment Load             | -0.0035         | 0.0005    | -6.915                  | <0.0001               |
| <b>Organic Load Experiment</b>                  |                          |                           |                 |           |                         |                       |
| Number of Bites                                 | Negative-binomial (GLMM) | Intercept                 | 4.3616          | 0.1819    | 23.976                  | <0.0001               |
|                                                 |                          | Organic Load              | -0.0064         | 0.0129    | -0.499                  | 0.618                 |
| Proportion of bites rejected                    | Binomial (GLMM)          | Intercept                 | -3.995          | 0.3237    | -12.342                 | <0.0001               |
|                                                 |                          | Organic Load              | 0.0348          | 0.0220    | 1.583                   | 0.113                 |
| Proportion of feeding bouts with multiple bites | Binomial (GLMM)          | Intercept                 | 0.6937          | 0.1881    | 3.689                   | <0.001                |
|                                                 |                          | Organic Load              | -0.0143         | 0.0134    | -1.067                  | 0.286                 |
