# Supplementary material for: The Effects of Algal Turf Sediments and Organic Loads on Feeding by Coral Reef Surgeonfishes
Source: PubMed Central journal article supplement (PMC5207718; doi:10.1371/journal.pone.0169479), 2017-01-03
Supplement: pone.0169479.s005.pdf [file pone.0169479.s005.pdf]

**S5 Table. Comparison of GLMMs used to examine the response of *Acanthurus nigrofuscus* to sediment and organic loads.** Models are compared using the corrected Akaike Information Criterion (AICc). Shown are degrees of freedom (df), model maximum log-likelihood (logLik), AICc, change in AICc ( $\Delta$ ) and AICc weight (wAICc).

| <b>Model</b>                                                | <b>Variables</b>           | <b>df</b> | <b>logLik</b> | <b>AICc</b> | <b><math>\Delta</math></b> | <b>wAICc</b> |
|-------------------------------------------------------------|----------------------------|-----------|---------------|-------------|----------------------------|--------------|
| Bite count<br>response to<br>sediment<br>loads              | Null                       | 3         | -1103.42      | 2212.99     | 0.00                       | 0.50         |
|                                                             | Sediment                   | 4         | -1103.27      | 2214.79     | 1.80                       | 0.21         |
|                                                             | Organics                   | 4         | -1103.37      | 2214.99     | 1.99                       | 0.19         |
|                                                             | Sediment + Organics        | 5         | -1103.22      | 2216.82     | 3.82                       | 0.07         |
|                                                             | Sediment $\times$ Organics | 6         | -1103.06      | 2218.65     | 5.65                       | 0.03         |
| Proportion<br>of feeding<br>bouts with<br>multiple<br>bites | Null                       | 3         | -440.84       | 887.83      | 0.00                       | 0.27         |
|                                                             | Organic                    | 4         | -439.83       | 887.90      | 0.08                       | 0.26         |
|                                                             | Sediment                   | 4         | -440.27       | 888.78      | 0.5                        | 0.17         |
|                                                             | Sediment + Organics        | 5         | -439.25       | 888.87      | 1.04                       | 0.16         |
|                                                             | Sediment $\times$ Organics | 6         | -438.28       | 889.08      | 1.25                       | 0.14         |
